# Supplementary material for: Prognostic significance of the pretreatment pan-immune-inflammation value in cancer patients: an updated meta-analysis of 30 studies
Source: Frontiers journal article supplement (doi:10.3389/fnut.2023.1259929), 2023-10-02
Supplement: Data_Sheet_1.pdf [file Data_Sheet_1.pdf]

Table S1. Quality assessment of included studies.

| Items                 | Study limitation considered | Long enough follow-up period | Univariate/multivariate analysis used | Predefinition of OS/PFS | Clear cut-off value of PIV | Clear description of including criteria | Clear description of tumor stage/ clinical setting | Patients' consent for research | Clear description of purpose objectives |
|-----------------------|-----------------------------|------------------------------|---------------------------------------|-------------------------|----------------------------|-----------------------------------------|----------------------------------------------------|--------------------------------|-----------------------------------------|
| Baba,2022(training)   | 1                           | 0                            | 0                                     | 1                       | 1                          | 1                                       | 1                                                  | 1                              | 1                                       |
| Baba,2022(validation) | 1                           | 0                            | 1                                     | 1                       | 1                          | 1                                       | 1                                                  | 1                              | 1                                       |
| Chen,2022             | 1                           | 1                            | 1                                     | 1                       | 1                          | 1                                       | 1                                                  | 1                              | 1                                       |
| Corti,2021            | 1                           | 0                            | 1                                     | 1                       | 1                          | 1                                       | 1                                                  | 1                              | 1                                       |
| Demir,2022            | 1                           | 0                            | 0                                     | 1                       | 1                          | 1                                       | 1                                                  | 1                              | 1                                       |
| Efile,2023            | 1                           | 1                            | 1                                     | 1                       | 1                          | 1                                       | 1                                                  | 1                              | 1                                       |
| Fuca,2020             | 1                           | 0                            | 1                                     | 1                       | 1                          | 1                                       | 1                                                  | 1                              | 1                                       |
| Fuca,2021             | 1                           | 0                            | 1                                     | 1                       | 1                          | 1                                       | 1                                                  | 1                              | 1                                       |
| Gambichler,2022       | 1                           | 0                            | 1                                     | 1                       | 1                          | 1                                       | 1                                                  | 1                              | 1                                       |
| Guyen,2021            | 1                           | 0                            | 1                                     | 1                       | 1                          | 1                                       | 1                                                  | 1                              | 1                                       |
| Guyen,2022            | 1                           | 0                            | 1                                     | 1                       | 1                          | 1                                       | 1                                                  | 1                              | 1                                       |
| Karadag,2022          | 1                           | 0                            | 1                                     | 1                       | 1                          | 1                                       | 1                                                  | 1                              | 1                                       |
| Kucuk,2023            | 1                           | 0                            | 1                                     | 1                       | 1                          | 1                                       | 1                                                  | 1                              | 1                                       |
| Liang,2023            | 1                           | 1                            | 1                                     | 1                       | 1                          | 1                                       | 1                                                  | 1                              | 1                                       |
| Ligorio,2021          | 1                           | 0                            | 1                                     | 1                       | 1                          | 1                                       | 1                                                  | 1                              | 1                                       |
| Lin,2022              | 1                           | 1                            | 1                                     | 1                       | 1                          | 1                                       | 1                                                  | 1                              | 1                                       |
| Mesti,2023            | 1                           | 1                            | 1                                     | 1                       | 1                          | 1                                       | 1                                                  | 1                              | 1                                       |
| Perez-Martelo,2022    | 1                           | 1                            | 1                                     | 1                       | 1                          | 1                                       | 1                                                  | 1                              | 1                                       |
| Provenzano,2023       | 1                           | 1                            | 1                                     | 1                       | 1                          | 1                                       | 1                                                  | 1                              | 1                                       |
| Qi,2023               | 1                           | 1                            | 1                                     | 1                       | 1                          | 1                                       | 1                                                  | 1                              | 1                                       |
| Sahin,2021            | 1                           | 0                            | 1                                     | 1                       | 1                          | 1                                       | 1                                                  | 1                              | 1                                       |
| Sato (1),2022         | 1                           | 0                            | 1                                     | 1                       | 1                          | 1                                       | 1                                                  | 1                              | 1                                       |

|                       |   |   |   |   |   |   |   |   |   |
|-----------------------|---|---|---|---|---|---|---|---|---|
| Sato (2),2022         | 1 | 0 | 1 | 1 | 1 | 1 | 1 | 1 | 1 |
| Susok,2022            | 1 | 1 | 1 | 1 | 1 | 1 | 1 | 1 | 1 |
| Topkan,2022           | 1 | 0 | 1 | 1 | 1 | 1 | 1 | 1 | 1 |
| Topkan,2022           | 1 | 0 | 1 | 1 | 1 | 1 | 1 | 1 | 1 |
| Wang,2022             | 1 | 1 | 1 | 1 | 1 | 1 | 1 | 1 | 1 |
| Yazgan,2022           | 1 | 1 | 1 | 1 | 1 | 1 | 1 | 1 | 1 |
| Yeh,2023              | 1 | 0 | 1 | 1 | 1 | 1 | 1 | 1 | 1 |
| Yekeduz,2022          | 1 | 0 | 1 | 1 | 1 | 1 | 1 | 1 | 1 |
| Zeng,2022(training)   | 1 | 0 | 1 | 1 | 1 | 1 | 1 | 1 | 1 |
| Zeng,2022(validation) | 1 | 0 | 1 | 1 | 1 | 1 | 1 | 1 | 1 |

Table S2. Meta-regression analyses for the association of confounding factors and the hazard ratio for overall survival and progression-free survival.

| Covariates         | Overall survival |         |              | Progression-free survival |         |              |
|--------------------|------------------|---------|--------------|---------------------------|---------|--------------|
|                    | $\beta$ value    | p value | 95%CI        | $\beta$ value             | p value | 95%CI        |
| Country            | 0.284            | 0.310   | -0.290-0.857 | -0.048                    | 0.872   | -0.671-0.576 |
| Study center       | 0.034            | 0.872   | -0.407-0.475 | -0.032                    | 0.899   | -0.562-0.498 |
| Sample size        | -0.097           | 0.635   | -0.520-0.326 | 0.052                     | 0.810   | -0.400-0.503 |
| Cancer type        | -0.031           | 0.534   | -0.134-0.072 | -0.034                    | 0.667   | -0.201-0.133 |
| Selection method   | -0.126           | 0.347   | -0.402-0.150 | -0.018                    | 0.947   | -0.573-0.528 |
| Cut-off value      | 0.209            | 0.248   | -0.160-0.577 | 0.121                     | 0.633   | -0.409-0.650 |
| Treatment strategy | 0.098            | 0.435   | -0.162-0.359 | 0.125                     | 0.413   | -0.193-0.442 |
| Tumor stage        | -0.169           | 0.239   | -0.461-0.124 | -0.207                    | 0.368   | -0.683-0.270 |
| Analysis method    | 0.086            | 0.666   | -0.328-0.499 | 0.314                     | 0.266   | -0.237-0.896 |
| Follow-up          | -0.020           | 0.862   | -0.256-0.217 | -0.043                    | 0.758   | -0.339-0.252 |

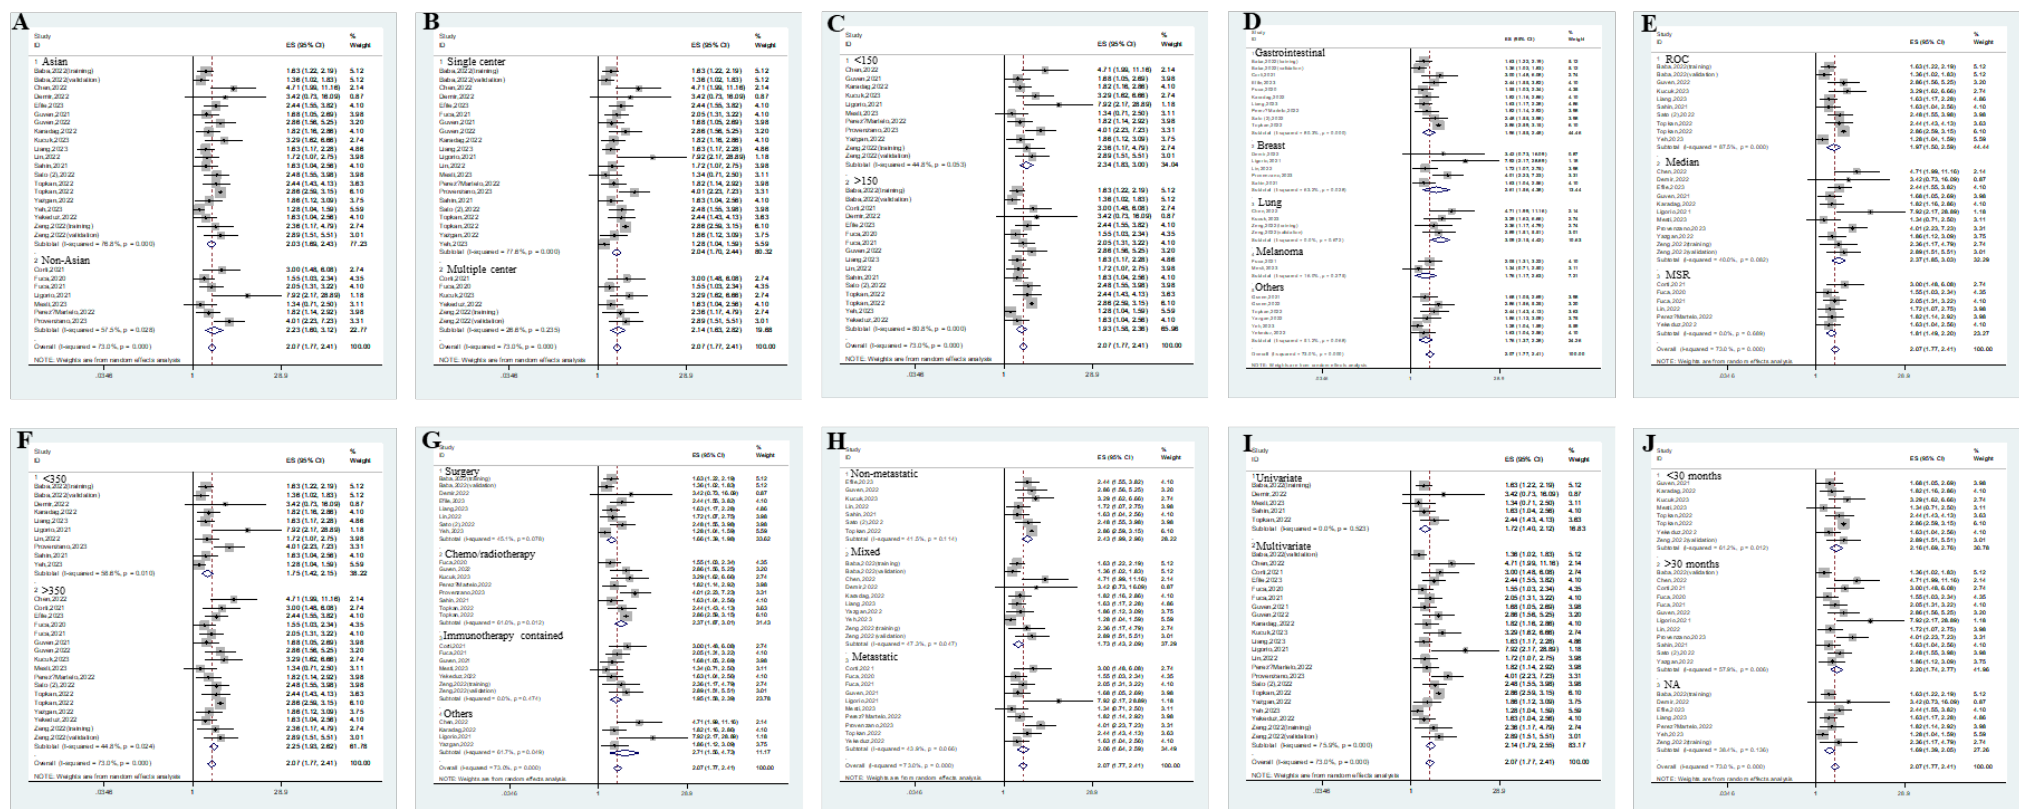

Figure S1. Forest plot of subgroup analyses assessing the relationship between the PIV score and OS. A: Country (Asian vs. Non-Asian); B: Study center (Single center vs. Multiple center); C: Sample size (>150 vs. <150); D: Cancer type (Gastrointestinal vs. Breast vs. Lung vs. Melanoma vs. Others); E: Selection method (ROC vs. Median vs. MSR); F: Cut-off value (<350 vs. >350); G: Treatment strategy (Surgery vs. Chemo/radiotherapy vs. Immunotherapy contained vs. Others); H: Tumor stage (Non-metastatic vs. Mixed vs. Metastatic); I: Analysis method (Univariate vs. Multivariate); J: Follow-up time (<30 months vs. >30 months vs. NA).

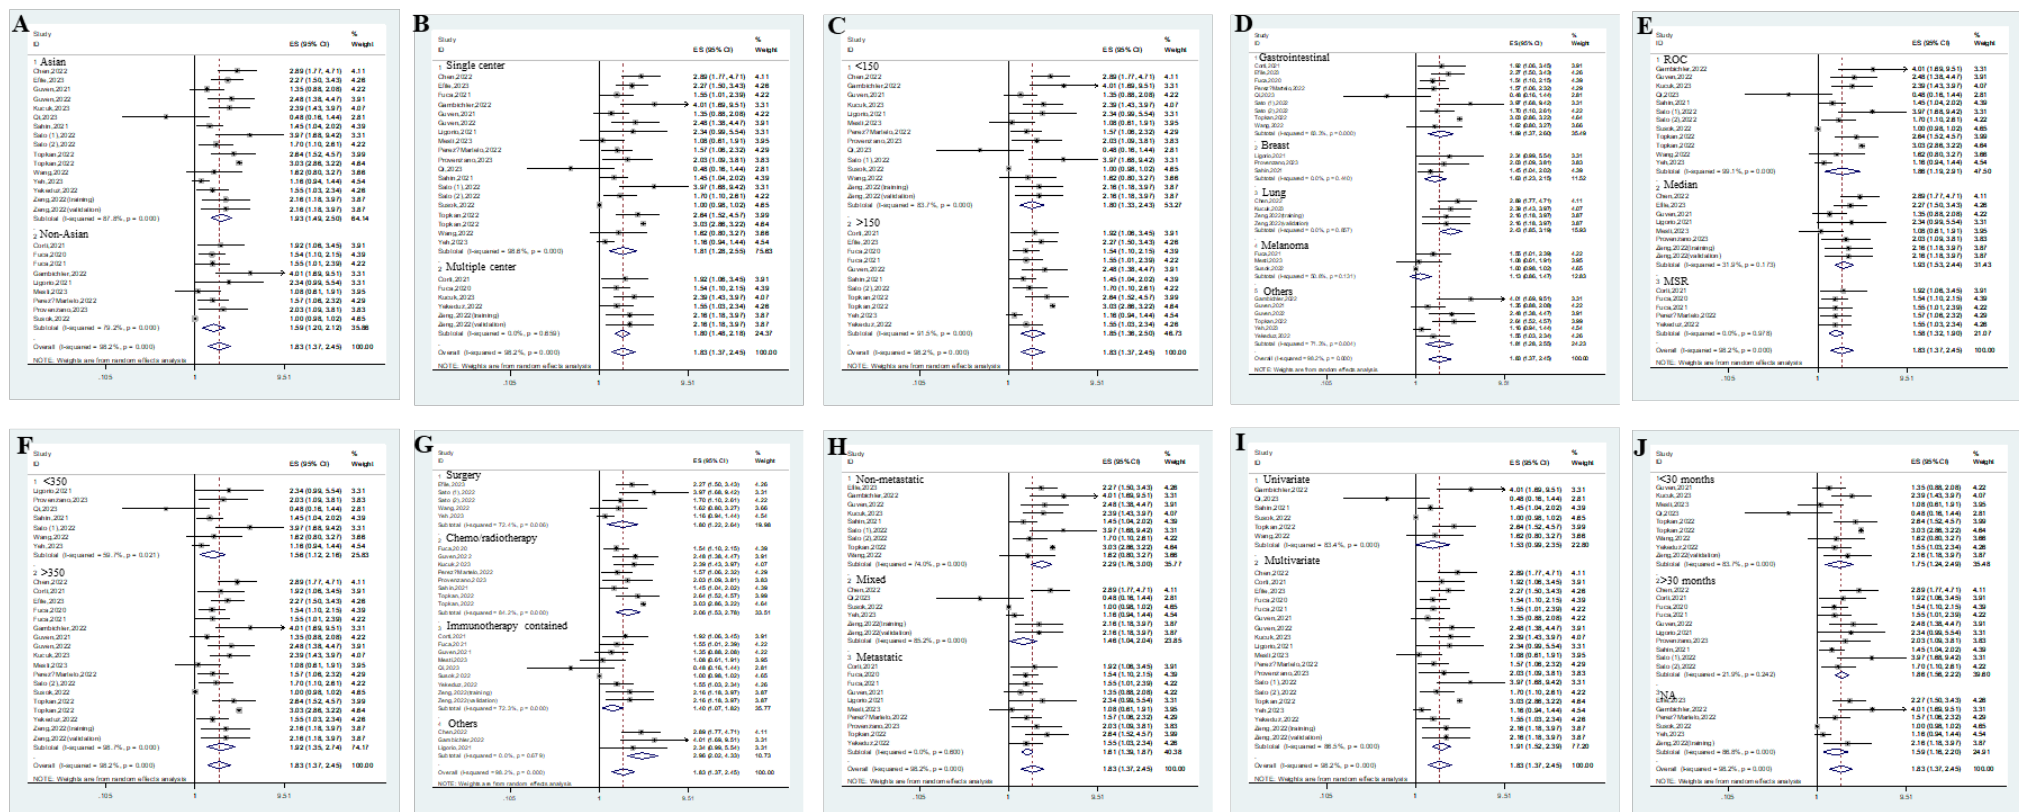

Figure S2. Forest plot of subgroup analyses assessing the relationship between the PIV score and PFS. A: Country (Asian vs. Non-Asian); B: Study center (Single center vs. Multiple center); C: Sample size (>150 vs. <150); D: Cancer type (Gastrointestinal vs. Breast vs. Lung vs. Melanoma vs. Others); E: Selection method (ROC vs. Median vs. MSR); F: Cut-off value (<350 vs. >350); G: Treatment strategy (Surgery vs. Chemo/radiotherapy vs. Immunotherapy contained vs. Others); H: Tumor stage (Non-metastatic vs. Mixed vs. Metastatic); I: Analysis method (Univariate vs. Multivariate); J: Follow-up time (<30 months vs. >30 months vs. NA).

**A**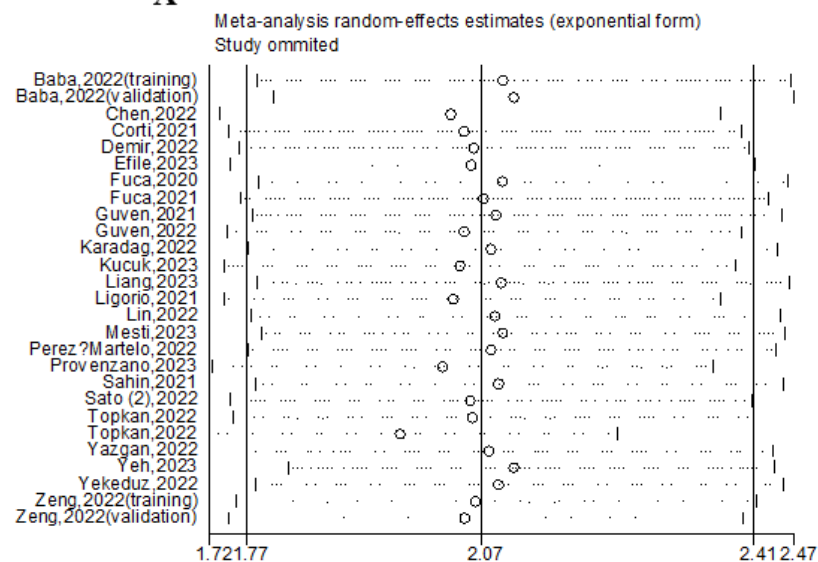**B**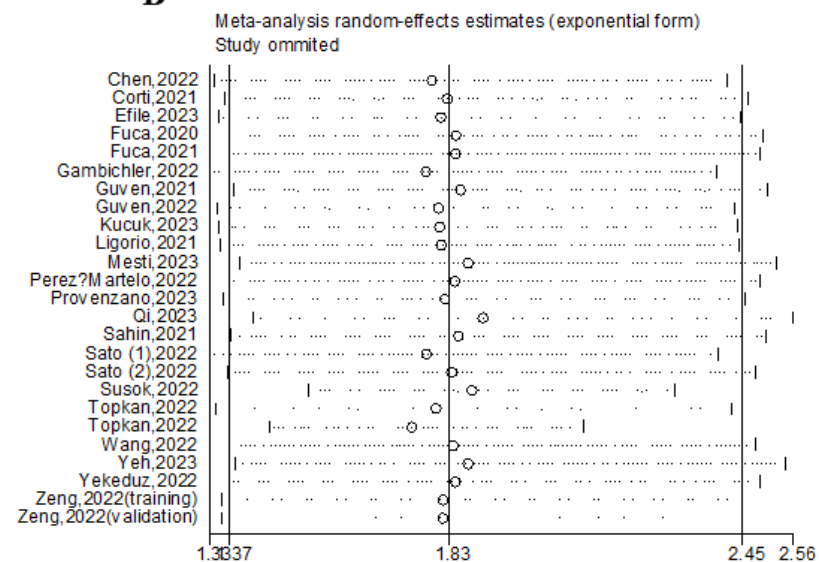

Figure S3. Sensitivity analyses assessing the relationship between the PIV score and survival outcomes including OS (A) and PFS (B).

**A**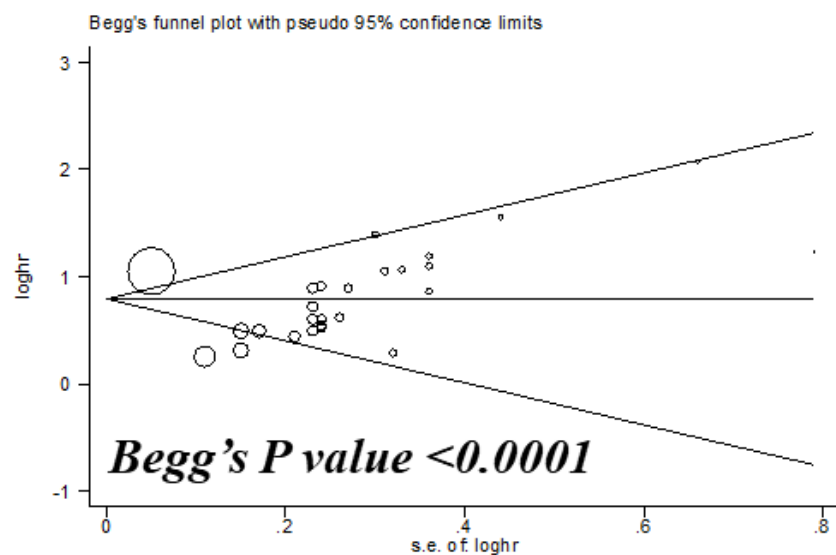**B**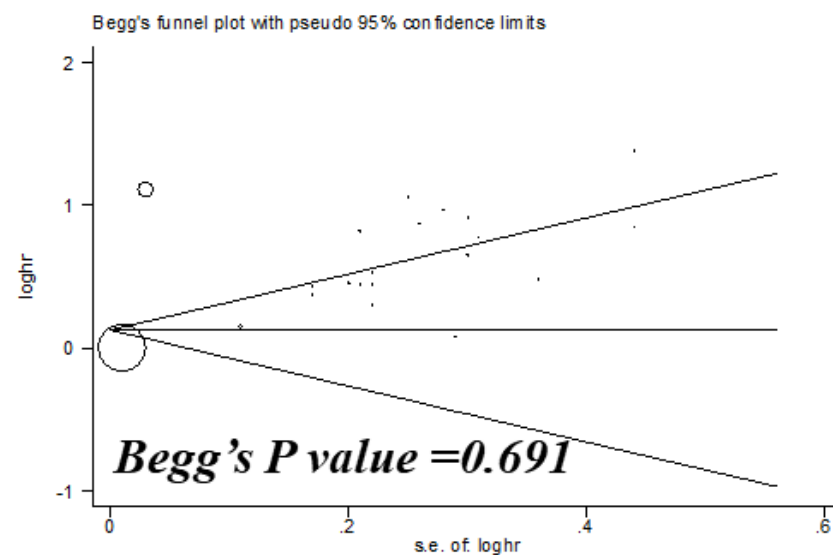

Figure S4. Begg's funnel plot assessing publication bias between PIV and survival outcomes, including OS (A) and PFS (B). The Begg's  $P$  values were  $<0.0001$  and 0.691, respectively.
